# Supplementary material for: Sunlight-Activated Long Persistent Luminescent Coating for Smart Highways
Source: MDPI journal article supplement (doi:10.3390/coatings13061050), 2023-06-06
Supplement: s1 [file s1]

# Supplementary Materials: Sunlight-Activated Long Persistent Luminescent Coating for Smart Highways

Mao Zheng <sup>1</sup>, Xin Li <sup>1</sup>, Yu Bai <sup>1</sup>, Shijun Tang <sup>1</sup>, Peiyang Li <sup>2</sup> and Qi Zhu <sup>2,\*</sup>

<sup>1</sup> Sichuan Shugong Expressway Mechanisation Engineering Co., Ltd., Chengdu 610000, China; scjzhengmao@163.com (M.Z.); xin15884884328@163.com (X.L.); baixiaobai02131218@163.com (Y.B.); tangshijun715@126.com (S.T.)

<sup>2</sup> Key Laboratory for Anisotropy and Texture of Materials (Ministry of Education), School of Materials Science and Engineering, Northeastern University, Shenyang 110819, China; lipeiyangneu@126.com (P.L.)

\* Correspondence: zhuq@smm.neu.edu.cn

**Citation:** Zheng, M.; Li, X.; Bai, Y.; Tang, S.; Li, P.; Zhu, Q. Sunlight-Activated Long Persistent Luminescent Coating for Smart Highways. *Coatings* **2023**, *13*, 1050. <https://doi.org/10.3390/coatings13061050>

Academic Editor: Mathieu G. Silly

Received: 12 May 2023

Revised: 31 May 2023

Accepted: 4 June 2023

Published: 6 June 2023

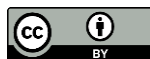

**Copyright:** © 2023 by the authors. Licensee MDPI, Basel, Switzerland. This article is an open access article distributed under the terms and conditions of the Creative Commons Attribution (CC BY) license (<https://creativecommons.org/licenses/by/4.0/>).

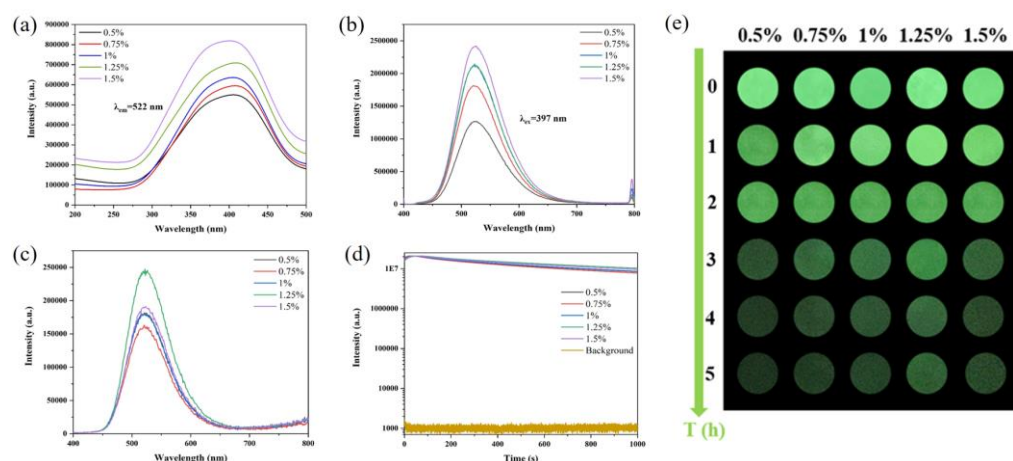

**Figure S1.** (a) PLE spectra, and (b) PL spectra of luminescent coatings with different SiO<sub>2</sub> contents. (c) Afterglow spectra, and (d) Afterglow decay curves of luminescent coatings with different SiO<sub>2</sub> contents obtained after 5 min illumination with 365 nm UV light. (e) Afterglow images of luminescent coatings taken after sunlight excitation for 2 h with different SiO<sub>2</sub> contents.

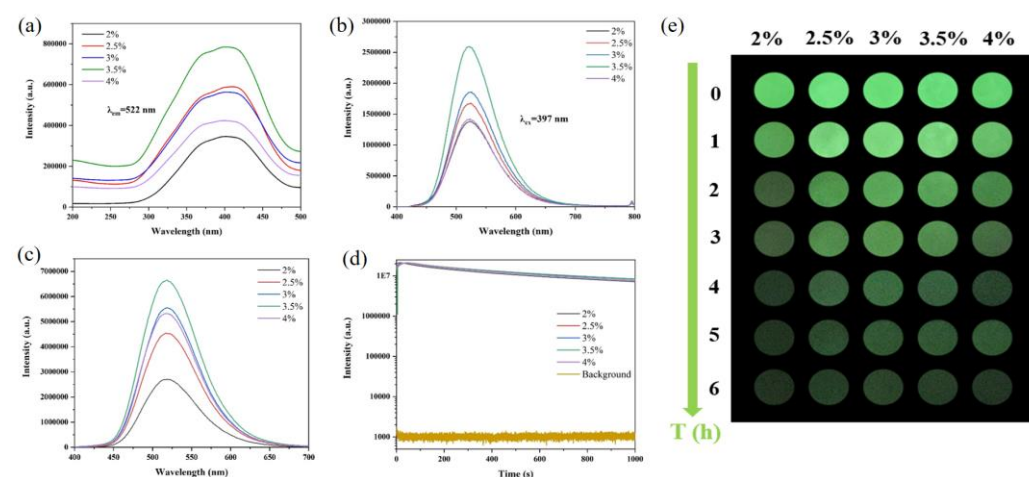

**Figure S2.** (a) PLE spectra, and (b) PL spectra of luminescent coatings with different CaCO<sub>3</sub> contents. (c) Afterglow spectra, and (d) Afterglow decay curves of luminescent coatings with different CaCO<sub>3</sub> contents obtained after 5 min illumination with 365 nm UV light. (e) Afterglow images of luminescent coatings taken after sunlight excitation for 2 h with different CaCO<sub>3</sub> contents.
